# Supplementary material for: Effect of Tryptic Digestion on Sensitivity and Specificity in MALDI-TOF-Based Molecular Diagnostics through Machine Learning
Source: MDPI journal article supplement (doi:10.3390/s23198042), 2023-09-23
Supplement: s1 [file s1]

## SUPPLEMENT S1: Results of Individual Trials.

**Note:** Number of trees, number of bins, learning rate are user adjustable parameters within the RapidMiner machine learning software associated with the gradient boosted tree model used in this work.

**Case Study 1** – Gluten vs Gluten Free Pancake Mix. Tables of machine learning predictive results.

### *Intact Samples with Peak Intensity used.*

| # of Trees | # of Bins | Learning Rate | Sensitivity | Specificity | J      | Diagnostic value |
|------------|-----------|---------------|-------------|-------------|--------|------------------|
| 101        | 40        | 0.00001       | 1           | 0.8125      | 0.8125 | excellent        |
| 101        | 40        | 0.0001        | 1           | 0.8125      | 0.8125 | excellent        |
| 101        | 40        | 0.01          | 1           | 0.9375      | 0.9375 | excellent        |
| 401        | 40        | 0.00001       | 1           | 0.8125      | 0.8125 | excellent        |
| 401        | 40        | 0.0001        | 1           | 0.8125      | 0.8125 | excellent        |
| 401        | 40        | 0.01          | 1           | 0.48        | 0.48   | marginal         |
| 701        | 40        | 0.00001       | 1           | 0.8125      | 0.8125 | excellent        |
| 701        | 40        | 0.0001        | 1           | 0.8125      | 0.8125 | excellent        |
| 701        | 40        | 0.01          | 1           | 0.48        | 0.48   | marginal         |

### *Intact Samples using binary (0,1) values for peak / no peak.*

| # of Trees | # of Bins | Learning Rate | Sensitivity | Specificity | J      | Diagnostic value |
|------------|-----------|---------------|-------------|-------------|--------|------------------|
| 50         | 20        | 0.01          | 1           | 1           | 1      | excellent        |
| 50         | 20        | 0.0001        | 1           | 1           | 1      | excellent        |
| 50         | 20        | 0.00001       | 1           | 1           | 1      | excellent        |
| 101        | 20        | 0.01          | 1           | 1           | 1      | excellent        |
| 101        | 20        | 0.0001        | 1           | 0           | 0      | None             |
| 101        | 20        | 0.00001       | 1           | 1           | 1      | excellent        |
| 401        | 20        | 0.01          | 1           | 0.94        | 0.94   | excellent        |
| 401        | 20        | 0.0001        | 1           | 1           | 1      | excellent        |
| 401        | 20        | 0.00001       | 1           | 1           | 1      | excellent        |
| 701        | 20        | 0.01          | 1           | 0.8125      | 0.8125 | excellent        |
| 701        | 20        | 0.0001        | 1           | 1           | 1      | excellent        |
| 701        | 20        | 0.00001       | 1           | 1           | 1      | excellent        |

### *Digested Samples with Peak Intensity used.*

| # of Trees | # of Bins | Learning Rate | Sensitivity | Specificity | J   | Diagnostic value |
|------------|-----------|---------------|-------------|-------------|-----|------------------|
| 101        | 40        | 0.00001       | 0.98        | 0.92        | 0.9 | excellent        |
| 101        | 40        | 0.0001        | 1           | 0           | 0   | None             |
| 101        | 40        | 0.01          | 1           | 0           | 0   | None             |
| 401        | 40        | 0.00001       | 0.98        | 0.92        | 0.9 | excellent        |
| 401        | 40        | 0.0001        | 0.98        | 0.92        | 0.9 | excellent        |
| 401        | 40        | 0.01          | 0.98        | 0.92        | 0.9 | excellent        |
| 701        | 40        | 0.00001       | 0.98        | 0.92        | 0.9 | excellent        |
| 701        | 40        | 0.0001        | 0.98        | 0.92        | 0.9 | excellent        |
| 701        | 40        | 0.01          | 1           | 0           | 0   | None             |

***Digested Samples using binary (0,1) values for peak / no peak.***

| # of Trees | # of Bins | Learning Rate | Sensitivity | Specificity | J     | Diagnostic value |
|------------|-----------|---------------|-------------|-------------|-------|------------------|
| 50         | 20        | 0.01          | 0.98        | 0.875       | 0.855 | excellent        |
| 50         | 20        | 0.0001        | 0.98        | 0.875       | 0.855 | excellent        |
| 50         | 20        | 0.00001       | 0.98        | 0.875       | 0.855 | excellent        |
| 101        | 20        | 0.01          | 0.98        | 0.875       | 0.855 | excellent        |
| 101        | 20        | 0.0001        | 0.98        | 0.875       | 0.855 | excellent        |
| 101        | 20        | 0.00001       | 0.98        | 0.875       | 0.855 | excellent        |
| 401        | 20        | 0.01          | 0.98        | 0.85        | 0.83  | excellent        |
| 401        | 20        | 0.0001        | 0.98        | 0.875       | 0.855 | excellent        |
| 401        | 20        | 0.00001       | 0.98        | 0.875       | 0.855 | excellent        |
| 701        | 20        | 0.01          | 0.98        | 0.69        | 0.67  | good             |
| 701        | 20        | 0.0001        | 0.98        | 0.875       | 0.855 | excellent        |
| 701        | 20        | 0.00001       | 0.98        | 0.875       | 0.855 | excellent        |

**Case Study 2 – *Salmonella Enterica* and *Salmonella Infantis******Intact Samples with Peak Intensity used.***

| # of Trees | # of Bins | Learning Rate | Sensitivity | Specificity | J    | Diagnostic value |
|------------|-----------|---------------|-------------|-------------|------|------------------|
| 101        | 40        | 0.00001       | 1           | 0.85        | 0.85 | excellent        |
| 101        | 40        | 0.0001        | 1           | 0.81        | 0.81 | excellent        |
| 101        | 40        | 0.01          | 1           | 0.94        | 0.94 | excellent        |
| 401        | 40        | 0.00001       | 1           | 0.85        | 0.85 | excellent        |
| 401        | 40        | 0.0001        | 1           | 0.85        | 0.85 | excellent        |
| 401        | 40        | 0.01          | 1           | 0.94        | 0.94 | excellent        |
| 701        | 40        | 0.00001       | 1           | 0.85        | 0.85 | excellent        |
| 701        | 40        | 0.0001        | 1           | 0.85        | 0.85 | excellent        |
| 701        | 40        | 0.01          | 1           | 0.94        | 0.94 | excellent        |

***Intact Samples using binary (0,1) values for peak / no peak.***

| # of Trees | # of Bins | Learning Rate | Sensitivity | Specificity | J    | Diagnostic value |
|------------|-----------|---------------|-------------|-------------|------|------------------|
| 50         | 20        | 0.01          | 0.98        | 0.98        | 0.96 | excellent        |
| 50         | 20        | 0.0001        | 0.94        | 1           | 0.94 | excellent        |
| 50         | 20        | 0.00001       | 0.92        | 1           | 0.92 | excellent        |
| 101        | 20        | 0.01          | 1           | 1           | 1    | excellent        |
| 101        | 20        | 0.0001        | 0.96        | 1           | 0.96 | excellent        |
| 101        | 20        | 0.00001       | 0.96        | 1           | 0.96 | excellent        |
| 401        | 20        | 0.01          | 1           | 1           | 1    | excellent        |
| 401        | 20        | 0.0001        | 0.96        | 1           | 0.96 | excellent        |
| 401        | 20        | 0.00001       | 0.94        | 1           | 0.94 | excellent        |
| 701        | 20        | 0.01          | 1           | 1           | 1    | excellent        |
| 701        | 20        | 0.0001        | 0.96        | 1           | 0.96 | excellent        |
| 701        | 20        | 0.00001       | 0.96        | 1           | 0.96 | excellent        |

***Digested Samples with Peak Intensity used.***

| # of Trees | # of Bins | Learning Rate | Sensitivity | Specificity | J | Diagnostic value |
|------------|-----------|---------------|-------------|-------------|---|------------------|
|------------|-----------|---------------|-------------|-------------|---|------------------|

|     |    |         |        |        |        |           |
|-----|----|---------|--------|--------|--------|-----------|
| 101 | 40 | 0.00001 | 0.9375 | 0.96   | 0.8975 | excellent |
| 101 | 40 | 0.0001  | 1      | 0.83   | 0.83   | excellent |
| 101 | 40 | 0.01    | 0.92   | 0.92   | 0.84   | excellent |
| 401 | 40 | 0.00001 | 1      | 0.8125 | 0.8125 | excellent |
| 401 | 40 | 0.0001  | 1      | 0.83   | 0.83   | excellent |
| 401 | 40 | 0.01    | 1      | 0.83   | 0.83   | excellent |
| 701 | 40 | 0.00001 | 1      | 0.8125 | 0.8125 | excellent |
| 701 | 40 | 0.0001  | 0.92   | 0.92   | 0.84   | excellent |
| 701 | 40 | 0.01    | 1      | 0.83   | 0.83   | excellent |

***Digested samples using binary (0,1) values for peak / no peak.***

| # of Trees | # of Bins | Learning Rate | Sensitivity | Specificity | J      | Diagnostic value |
|------------|-----------|---------------|-------------|-------------|--------|------------------|
| 50         | 20        | 0.01          | 0.98        | 0.9         | 0.88   | excellent        |
| 50         | 20        | 0.0001        | 1           | 0.8         | 0.8    | excellent        |
| 50         | 20        | 0.00001       | 1           | 0.8         | 0.8    | excellent        |
| 101        | 20        | 0.01          | 1           | 0.92        | 0.92   | excellent        |
| 101        | 20        | 0.0001        | 1           | 0.8         | 0.8    | excellent        |
| 101        | 20        | 0.00001       | 1           | 0.8         | 0.8    | excellent        |
| 401        | 20        | 0.01          | 1           | 0.8125      | 0.8125 | excellent        |
| 401        | 20        | 0.0001        | 1           | 0.8         | 0.8    | excellent        |
| 401        | 20        | 0.00001       | 1           | 0.81        | 0.81   | excellent        |
| 701        | 20        | 0.01          | 1           | 0.67        | 0.67   | good             |
| 701        | 20        | 0.0001        | 1           | 0.8         | 0.8    | excellent        |
| 701        | 20        | 0.00001       | 1           | 0.8         | 0.8    | excellent        |

---

**Case Study 3 – *Salmonella Infantis* blaCTXM-65 Gene ML results.**

***Intact Samples with Peak Intensity used.***

| # of Trees | # of Bins | Learning rate | Sensitivity | Specificity | J | Diagnostic value |
|------------|-----------|---------------|-------------|-------------|---|------------------|
| 101        | 40        | 0.00001       | 1           | 0           | 0 | None             |
| 101        | 40        | 0.0001        | 1           | 0           | 0 | None             |
| 101        | 40        | 0.01          | 1           | 0           | 0 | None             |
| 401        | 40        | 0.00001       | 1           | 0           | 0 | None             |
| 401        | 40        | 0.0001        | 1           | 0           | 0 | None             |
| 401        | 40        | 0.01          | 1           | 0           | 0 | None             |
| 701        | 40        | 0.00001       | 1           | 0           | 0 | None             |
| 701        | 40        | 0.0001        | 1           | 0           | 0 | None             |
| 701        | 40        | 0.01          | 1           | 0           | 0 | None             |

***Intact Samples using binary (0,1) values for peak / no peak.***

| # of Trees | # of Bins | Learning rate | Sensitivity | Specificity | J | Diagnostic value |
|------------|-----------|---------------|-------------|-------------|---|------------------|
| 50         | 20        | 0.01          | 1           | 0           | 0 | None             |
| 50         | 20        | 0.0001        | 1           | 0           | 0 | None             |
| 50         | 20        | 0.00001       | 1           | 0           | 0 | None             |

|     |    |         |   |   |   |      |
|-----|----|---------|---|---|---|------|
| 101 | 20 | 0.01    | 1 | 0 | 0 | None |
| 101 | 20 | 0.0001  | 1 | 0 | 0 | None |
| 101 | 20 | 0.00001 | 1 | 0 | 0 | None |
| 401 | 20 | 0.01    | 1 | 0 | 0 | None |
| 401 | 20 | 0.0001  | 1 | 0 | 0 | None |
| 401 | 20 | 0.00001 | 1 | 0 | 0 | None |
| 701 | 20 | 0.01    | 1 | 0 | 0 | None |
| 701 | 20 | 0.0001  | 1 | 0 | 0 | None |
| 701 | 20 | 0.00001 | 1 | 0 | 0 | None |

***Digested Samples with Peak Intensity used.***

| # of Trees | # of Bins | Learning rate | Sensitivity | Specificity | J     | Diagnostic value |
|------------|-----------|---------------|-------------|-------------|-------|------------------|
| 101        | 40        | 0.00001       | 0.85        | 0.33        | 0.18  | marginal         |
| 101        | 40        | 0.0001        | 0.85        | 0.33        | 0.18  | marginal         |
| 101        | 40        | 0.01          | 1           | 1           | 1     | excellent        |
| 401        | 40        | 0.00001       | 0.85        | 0.33        | 0.18  | marginal         |
| 401        | 40        | 0.0001        | 0.87        | 0.33        | 0.20  | marginal         |
| 401        | 40        | 0.01          | 1           | 0.972       | 0.972 | excellent        |
| 701        | 40        | 0.00001       | 0.85        | 0.33        | 0.18  | marginal         |
| 701        | 40        | 0.0001        | 0.95        | 0.33        | 0.28  | marginal         |
| 701        | 40        | 0.01          | 1           | 0.61        | 0.61  | good             |

***Digested samples using binary (0,1) values for peak / no peak.***

| # of Trees | # of Bins | Learning rate | Sensitivity | Specificity | J     | Diagnostic value |
|------------|-----------|---------------|-------------|-------------|-------|------------------|
| 50         | 20        | 0.01          | 0.9         | 0.861       | 0.761 | excellent        |
| 50         | 20        | 0.0001        | 0.567       | 0.917       | 0.484 | marginal         |
| 50         | 20        | 0.00001       | 0.567       | 0.917       | 0.484 | marginal         |
| 101        | 20        | 0.01          | 0.867       | 0.917       | 0.784 | excellent        |
| 101        | 20        | 0.0001        | 0.567       | 0.917       | 0.484 | marginal         |
| 101        | 20        | 0.00001       | 0.567       | 0.917       | 0.484 | marginal         |
| 401        | 20        | 0.01          | 1           | 0.64        | 0.64  | good             |
| 401        | 20        | 0.0001        | 0.567       | 0.917       | 0.484 | marginal         |
| 401        | 20        | 0.00001       | 0.567       | 0.917       | 0.484 | marginal         |
| 701        | 20        | 0.01          | 1           | 0.306       | 0.306 | marginal         |
| 701        | 20        | 0.0001        | 0.567       | 0.917       | 0.484 | marginal         |
| 701        | 20        | 0.00001       | 0.567       | 0.917       | 0.484 | marginal         |

**Case Study 4 – *Staphylococcus* Toxin producing vs. No Toxin.**

***Intact Samples with Peak Intensity used.***

| # of Trees | # of Bins | Learning rate | Sensitivity | Specificity | J    | Diagnostic value |
|------------|-----------|---------------|-------------|-------------|------|------------------|
| 101        | 40        | 0.00001       | 0           | 0.1         | -0.9 | None             |

|     |    |         |      |     |       |      |
|-----|----|---------|------|-----|-------|------|
| 101 | 40 | 0.0001  | 0    | 0.1 | -0.9  | None |
| 101 | 40 | 0.01    | 0    | 0.1 | -0.9  | None |
| 401 | 40 | 0.00001 | 0    | 0.1 | -0.9  | None |
| 401 | 40 | 0.0001  | 0    | 0.1 | -0.9  | None |
| 401 | 40 | 0.01    | 0.46 | 0.1 | -0.44 | None |
| 701 | 40 | 0.00001 | 0    | 0.1 | -0.9  | None |
| 701 | 40 | 0.0001  | 0    | 0.1 | -0.9  | None |
| 701 | 40 | 0.01    | 0.44 | 0.1 | -0.46 | None |

***Intact Samples using binary (0,1) values for peak / no peak.***

| # of Trees | # of Bins | Learning Rate | Sensitivity | Specificity | J    | Diagnostic value |
|------------|-----------|---------------|-------------|-------------|------|------------------|
| 50         | 20        | 0.01          | 0           | 0.1         | -0.9 | None             |
| 50         | 20        | 0.0001        | 0           | 0.1         | -0.9 | None             |
| 50         | 20        | 0.00001       | 0           | 0.1         | -0.9 | None             |
| 101        | 20        | 0.01          | 1           | 0           | 0    | None             |
| 101        | 20        | 0.0001        | 1           | 0           | 0    | None             |
| 101        | 20        | 0.00001       | 0           | 0.1         | -0.9 | None             |
| 401        | 20        | 0.01          | 0           | 0.1         | -0.9 | None             |
| 401        | 20        | 0.0001        | 0           | 0.1         | -0.9 | None             |
| 401        | 20        | 0.00001       | 0           | 0.1         | -0.9 | None             |
| 701        | 20        | 0.01          | 1           | 0           | 0    | None             |
| 701        | 20        | 0.0001        | 0           | 0.1         | -0.9 | None             |
| 701        | 20        | 0.00001       | 0           | 0.1         | -0.9 | None             |

***Digested Samples with Peak Intensity used.***

| # of Trees | # of Bins | Learning Rate | Sensitivity | Specificity | J    | Diagnostic value |
|------------|-----------|---------------|-------------|-------------|------|------------------|
| 101        | 40        | 0.00001       | 0.48        | 0.8         | 0.28 | marginal         |
| 101        | 40        | 0.0001        | 0.46        | 0.98        | 0.44 | marginal         |
| 101        | 40        | 0.01          | 0.4         | 0.92        | 0.32 | marginal         |
| 401        | 40        | 0.00001       | 0.48        | 0.85        | 0.33 | marginal         |
| 401        | 40        | 0.0001        | 0.46        | 0.98        | 0.44 | marginal         |
| 401        | 40        | 0.01          | 0.4         | 0.88        | 0.28 | marginal         |
| 701        | 40        | 0.00001       | 0.46        | 0.8         | 0.26 | marginal         |
| 701        | 40        | 0.0001        | 0.46        | 0.98        | 0.44 | marginal         |
| 701        | 40        | 0.01          | 0.4         | 0.88        | 0.28 | marginal         |

***Digested samples using binary (0,1) values for peak / no peak.***

| # of Trees | # of Bins | Learning Rate | Sensitivity | Specificity | J    | Diagnostic value |
|------------|-----------|---------------|-------------|-------------|------|------------------|
| 50         | 20        | 0.01          | 0.33        | 0.96        | 0.29 | marginal         |
| 50         | 20        | 0.0001        | 0.44        | 0.83        | 0.27 | marginal         |
| 50         | 20        | 0.00001       | 0.33        | 1           | 0.33 | marginal         |
| 101        | 20        | 0.01          | 0.63        | 0.88        | 0.51 | marginal         |
| 101        | 20        | 0.0001        | 0.44        | 0.83        | 0.27 | marginal         |
| 101        | 20        | 0.00001       | 0.33        | 1           | 0.33 | marginal         |
| 401        | 20        | 0.01          | 0.77        | 0.46        | 0.23 | marginal         |

|     |    |         |      |      |      |          |
|-----|----|---------|------|------|------|----------|
| 401 | 20 | 0.0001  | 0.44 | 0.83 | 0.27 | marginal |
| 401 | 20 | 0.00001 | 0.33 | 1    | 0.33 | marginal |
| 701 | 20 | 0.01    | 0.85 | 0.17 | 0.02 | poor     |
| 701 | 20 | 0.0001  | 0.33 | 1    | 0.33 | marginal |
| 701 | 20 | 0.00001 | 0.44 | 0.83 | 0.27 | marginal |
